# Supplementary material for: Start-Up and Performance of a Full Scale Passive System In-Cluding Biofilters for the Treatment of Fe, as and Mn in a Neutral Mine Drainage
Source: MDPI journal article supplement (doi:10.3390/w14121963), 2022-06-19
Supplement: s1 [file s1]

Archive with 1 entries (1 files):
- water-1729002-supplementary.pdf
