# Supplementary material for: Start-Up and Performance of a Full Scale Passive System In-Cluding Biofilters for the Treatment of Fe, as and Mn in a Neutral Mine Drainage
Source: MDPI journal article supplement (doi:10.3390/w14121963), 2022-06-19
Supplement: s1 [file s1 › water-1729002-supplementary.pdf]

# Start-up and performance of a full scale passive system including biofilters for the treatment of Fe, As and Mn in a neutral mine drainage

Jérôme Jacob (BRGM), Catherine Jouliau (BRGM), Fabienne Battaglia-Brunet (BRGM)

## Supplementary Material

**Table S1.** Target genes, primers and qPCR programs

| Target gene, specificity                   | Primers (5'-3' sequence)                                                                        | qPCR Program                                                                                                                                                   | Reference                    |
|--------------------------------------------|-------------------------------------------------------------------------------------------------|----------------------------------------------------------------------------------------------------------------------------------------------------------------|------------------------------|
| 16S rRNA gene, <i>Bacteria</i>             | 341F<br>(5'-CCTACGGGAGGCAGCAG-3')<br>534R<br>(5'-ATTACCGCGGCTGCTGGCA-3')                        | 95°C for 3 min<br>35 cycles of : 95°C for 15s ;<br>60°C for 30s ; 72°C for 30s;<br>80°C for 30s<br>0.5°C temperature increment<br>every 10s, from 65°C to 95°C | Michel et al. (2021)         |
| <i>aioA</i> gene, AsIII-oxidising bacteria | aoxBM4-1F<br>(5'-GCCGGCGGGGNTWYGARRAYA-3')<br>aoxBM2-1R<br>(5'-GGAGTTGTAGGCGGGCCKRTTTRTGDAT_3') | 3 min 95°C<br>50 cycles of : 95°C for 10s ;<br>54°C for 20s ; 72°C for 30s;<br>80°C for 30s<br>0.5°C temperature increment<br>every 10s, from 65°C to 95°C     | Fernandez-Rojo et al. (2017) |

Michel, C., Baran, N., André, L., Charron, M., Jouliau, C., 2021. Side effects of pesticides and metabolites in groundwater: Impact on denitrification. *Front. Microbiol.* 12, 662727.

<https://doi.org/10.3389/fmicb.2021.662727> Fernandez-Rojo, L., Héry, M., Le Pape, P., Braungardt, C., Desoeuvre, A., Torres, E., Tardy, V., Resongles, E., Laroche, E., Delpoux, S., Jouliau, C., Battaglia-Brunet, F., Boisson, J., Grapin, G., Morin, G., Casiot, C., 2017. Biological attenuation of arsenic and iron in a continuous flow bioreactor treating acid mine drainage (AMD). *Wat. Res.* 123, 594-606.

<https://doi.org/10.1016/j.watres.2017.06.059>

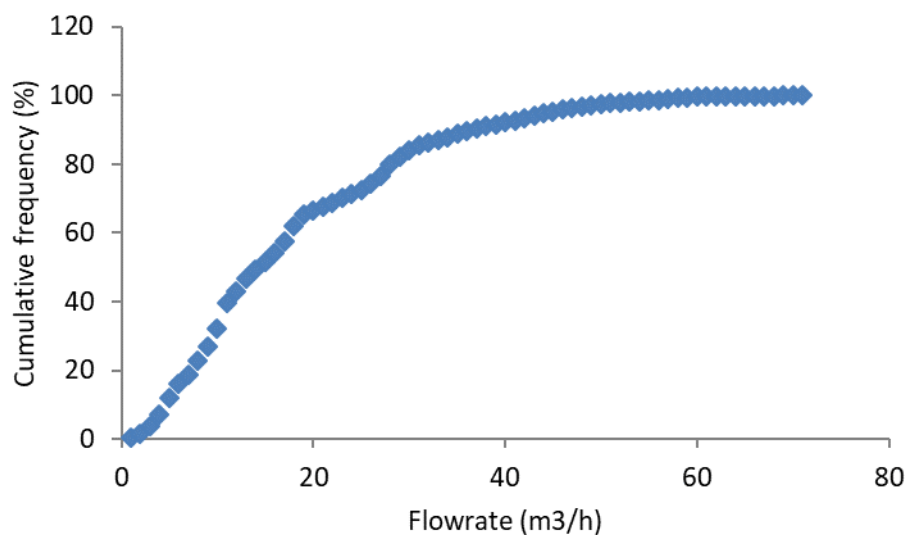

**Figure S1.** Cumulative frequency (%) of Lopérec mine water flowrate

**Table S2.** Lopérec treatment system removal performance (dissolved)

| Compartment   | Parameters<br>(% removal of<br>dissolved<br>species) | 2017 | 2018 |
|---------------|------------------------------------------------------|------|------|
| Settling pond | Fe                                                   | 95   | 99   |
|               | As                                                   | 97   | 96   |
|               | Mn                                                   | 13   | 14   |
| Biofilter     | Fe                                                   | -    | -    |
|               | As                                                   | -    | -    |
|               | Mn                                                   | 59   | 66   |

**Table S3.** Comparison of the sludge composition between the two steps of Loperec treatment system

| Parameters (%)                 | Settling pond | Biofilter |
|--------------------------------|---------------|-----------|
| Al <sub>2</sub> O <sub>3</sub> | 1.75          | 0,97      |
| Corga                          |               | 0.52      |
| CaO                            | 1.36          | 2.73      |
| Ctotal                         |               | 1.03      |
| Fe <sub>2</sub> O <sub>3</sub> | 52            | 46.7      |
| K <sub>2</sub> O               | 0.286         | 0.14      |
| MgO                            | 0.45          | 0.53      |
| MnO                            | 4.18          | 15.3      |
| Na <sub>2</sub> O              | <0,20         | <0.20     |
| P <sub>2</sub> O <sub>5</sub>  | 0.766         | 0.77      |
| SiO <sub>2</sub>               | 14.7          | 8.7       |
| Total sulphur                  |               | 0.05      |
| TiO <sub>2</sub>               | 0.105         | 0.09      |
| Loss on Ignition               | 23.3          | 24        |

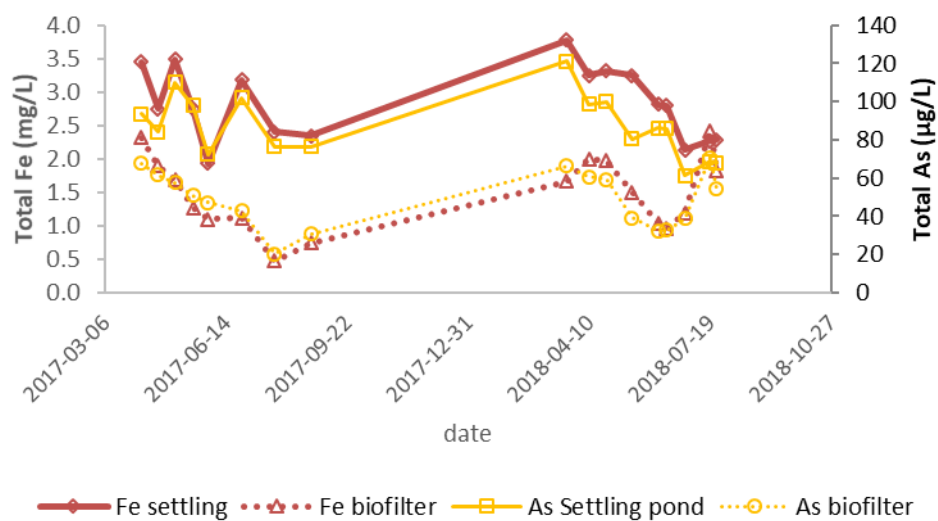

**Figure S2.** Total Fe and As in settling pond and biofilter

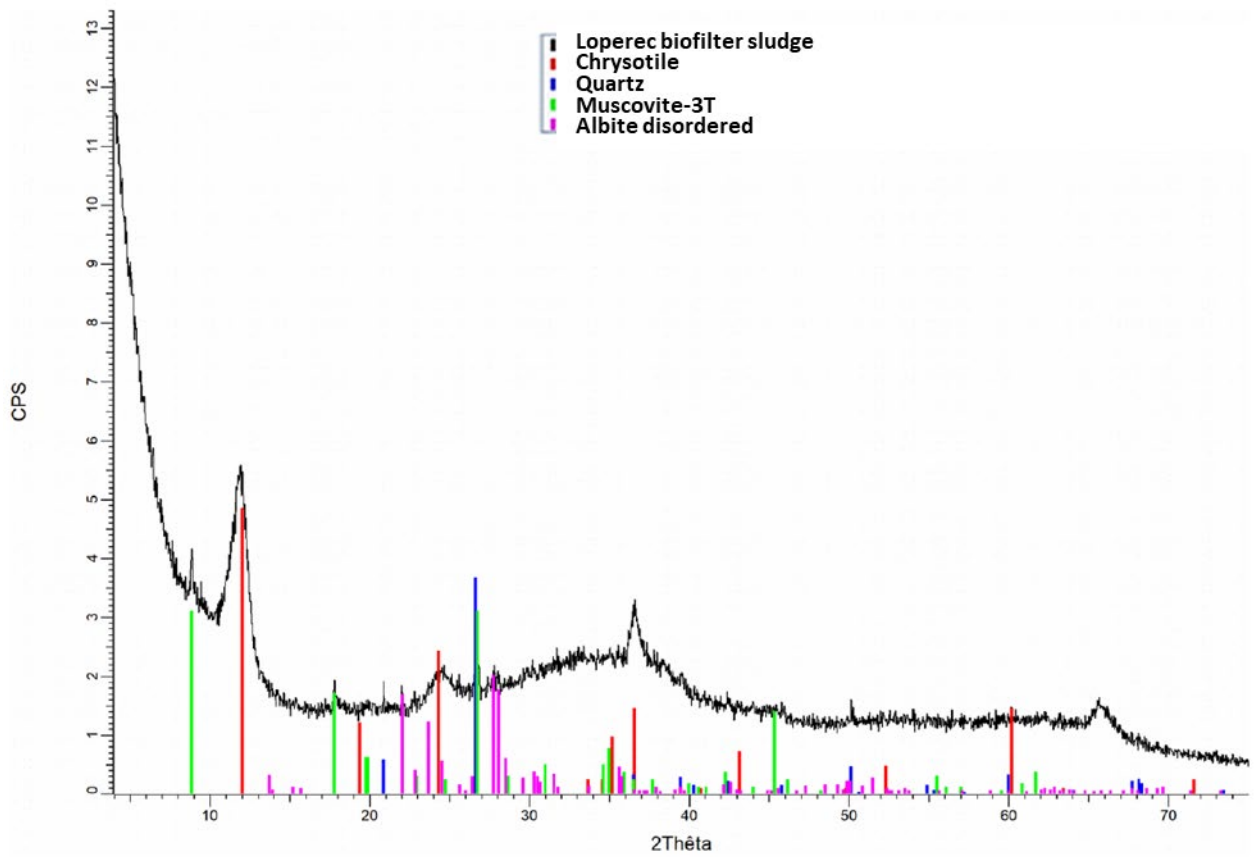

**Figure S3.** XRD spectrum of the sludge from the biofilter (black curve). Main minerals are chrysotile (red bars), quartz (blue bars), muscovite (green bars) and albite (pink bars).
